# Supplementary material for: Nc886 is epigenetically repressed in prostate cancer and acts as a tumor suppressor through the inhibition of cell growth
Source: Springer Nature journal article supplement (doi:10.1186/s12885-018-4049-7), 2018-02-02
Supplement: MOESM2 [file 15436040]

**A**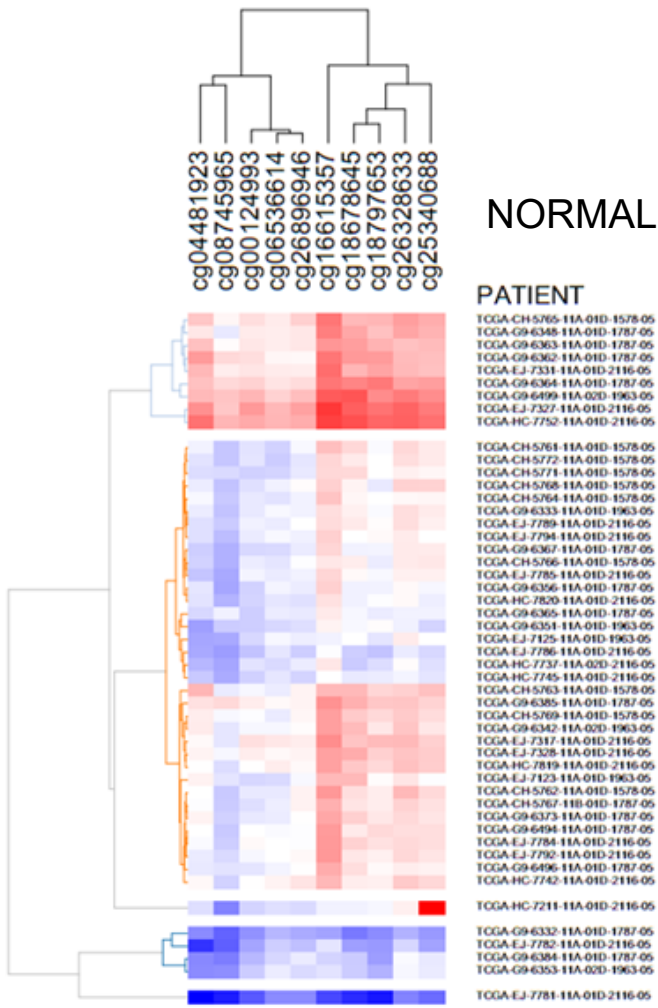**B**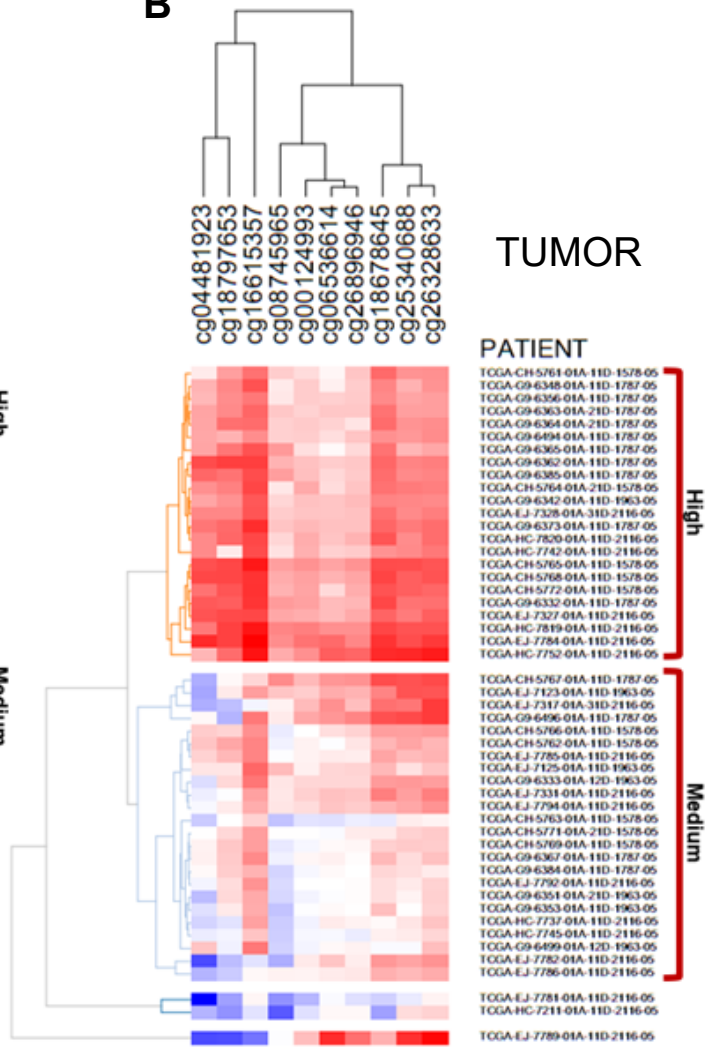**C**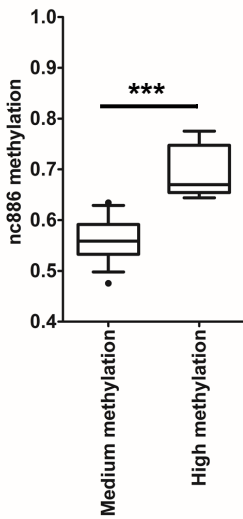**D**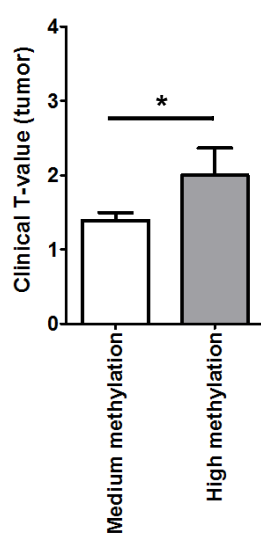**NORMAL****E**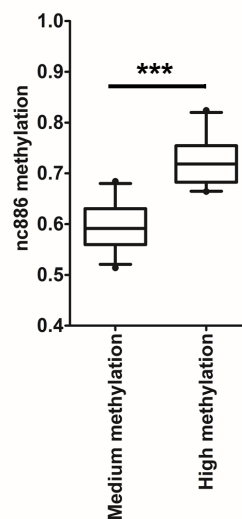**F**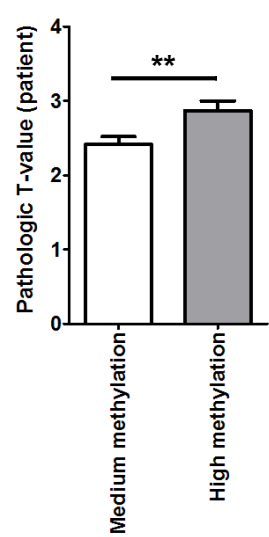**TUMOR**
